# Supplementary material
Source: publisher figshare collection journal article supplement (https://tandf.figshare.com/articles/dataset/_/4126656)
Supplement: Supplementary file 1 [file 2]

Supplementary Figure S1

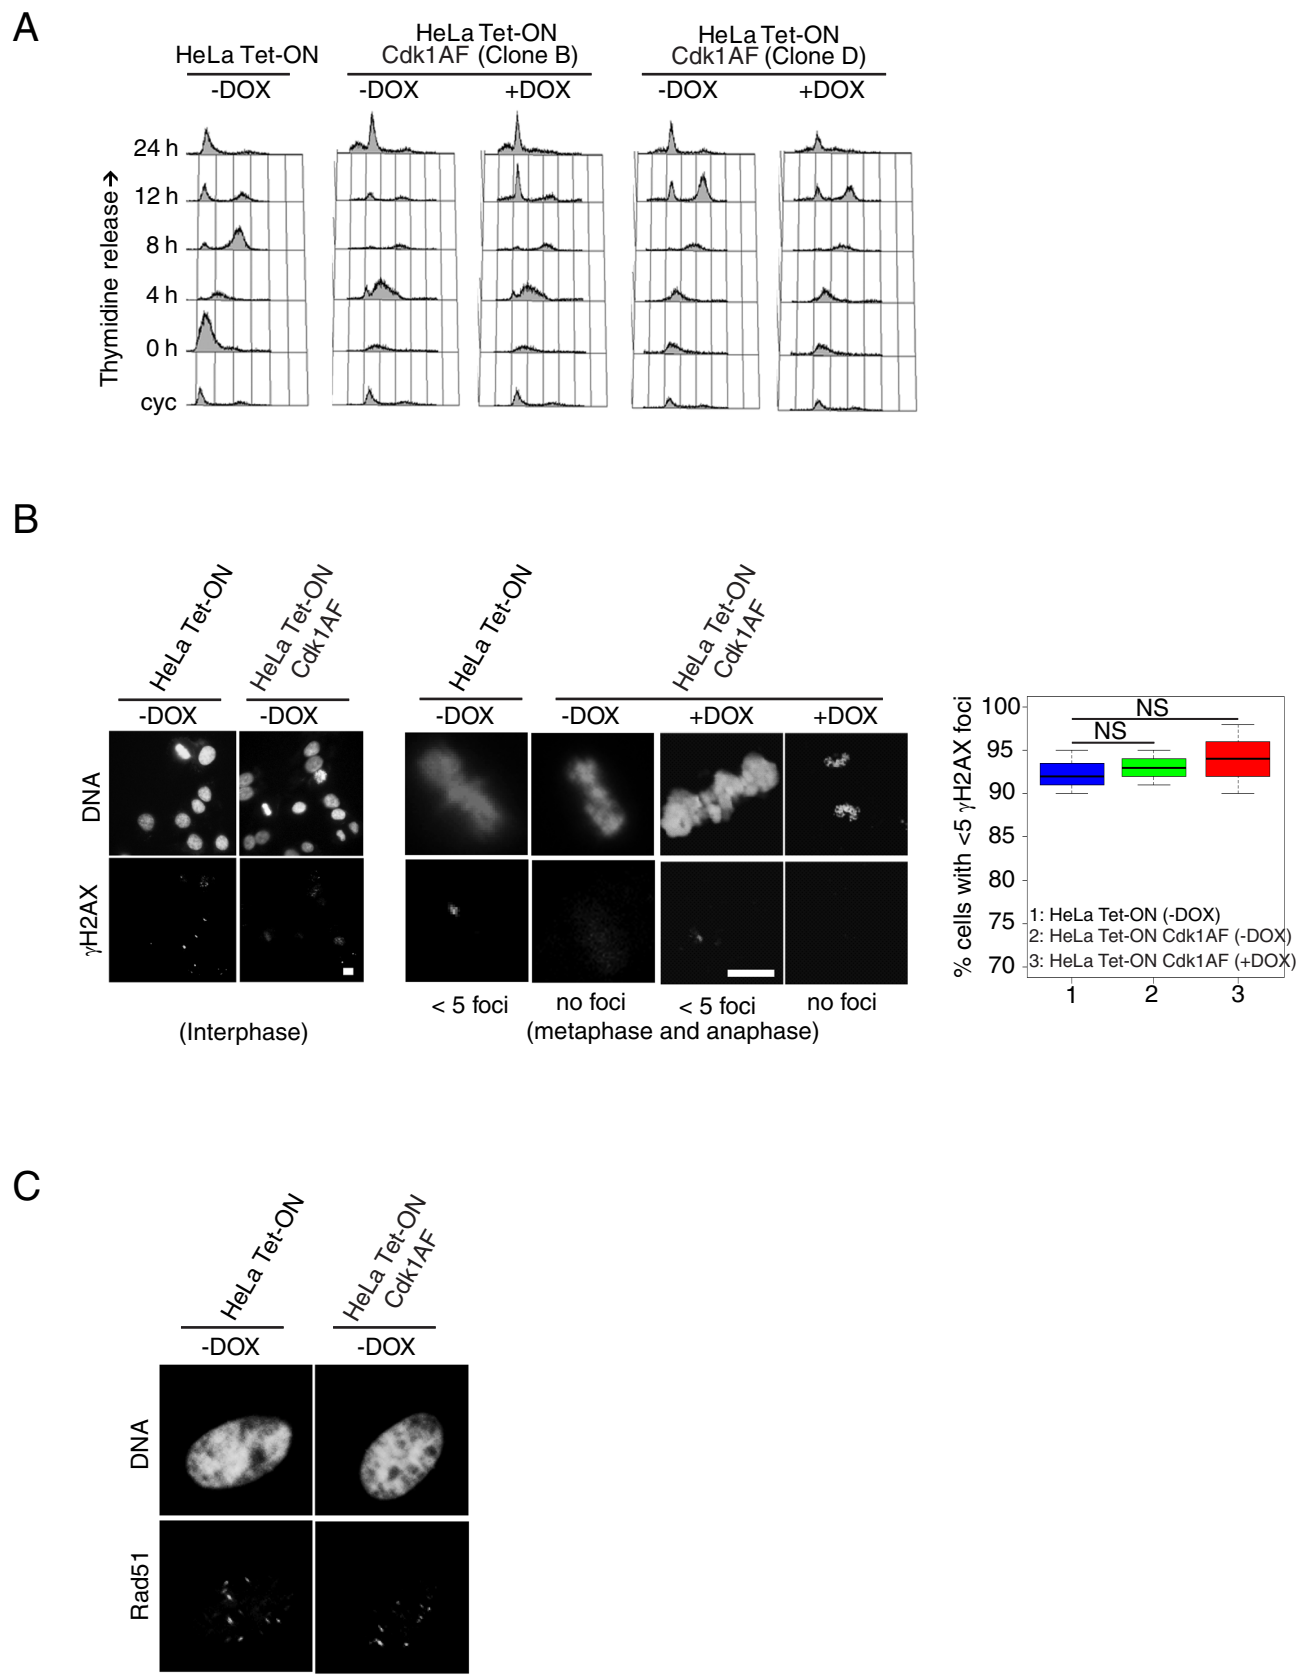

# Supplementary Figure S2

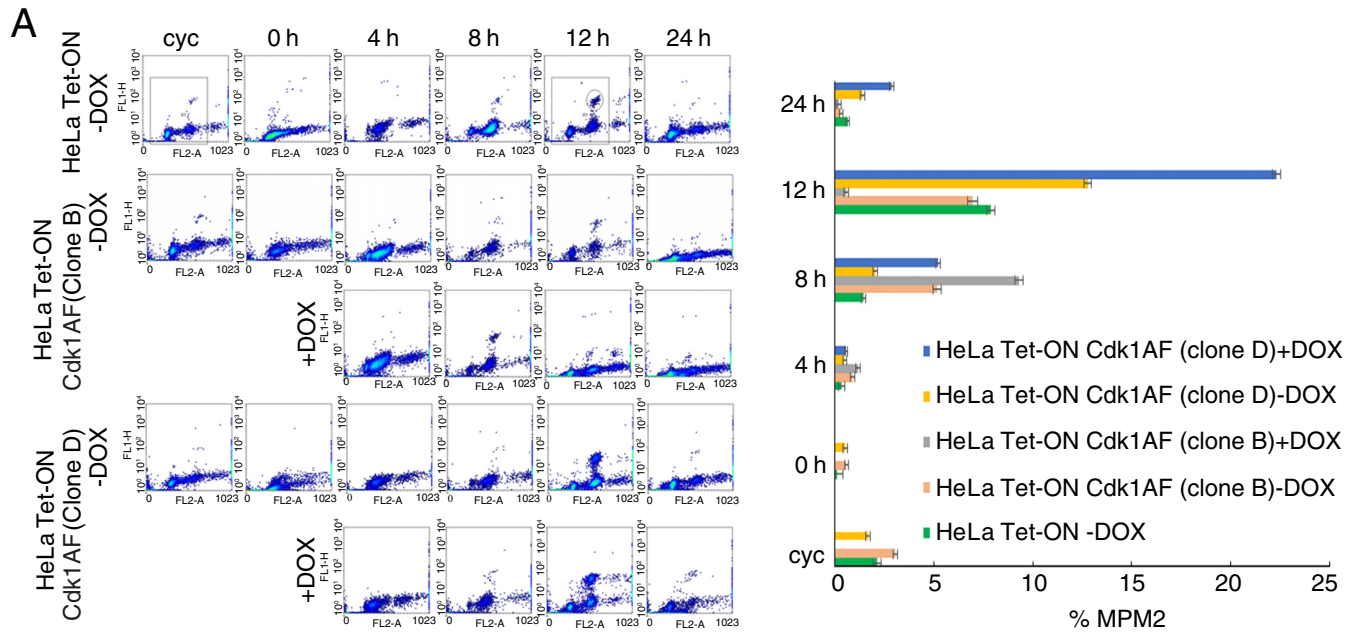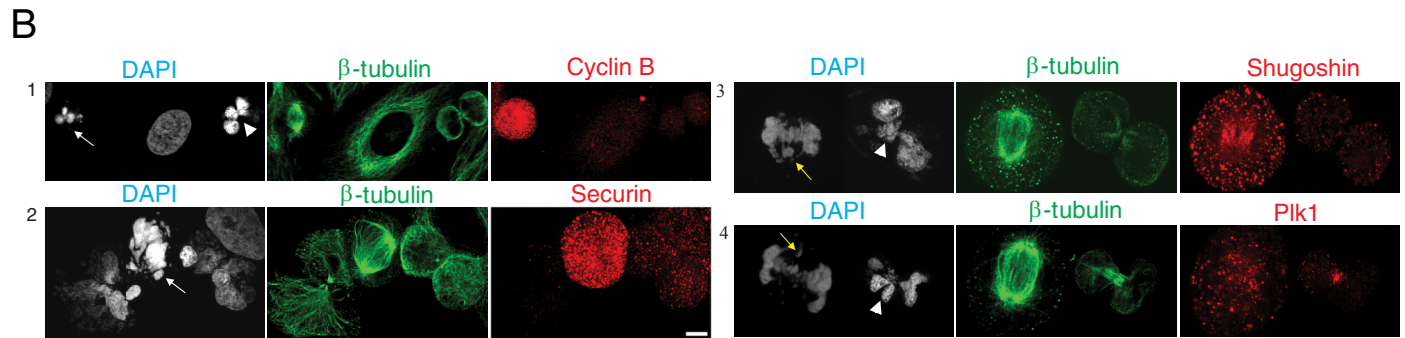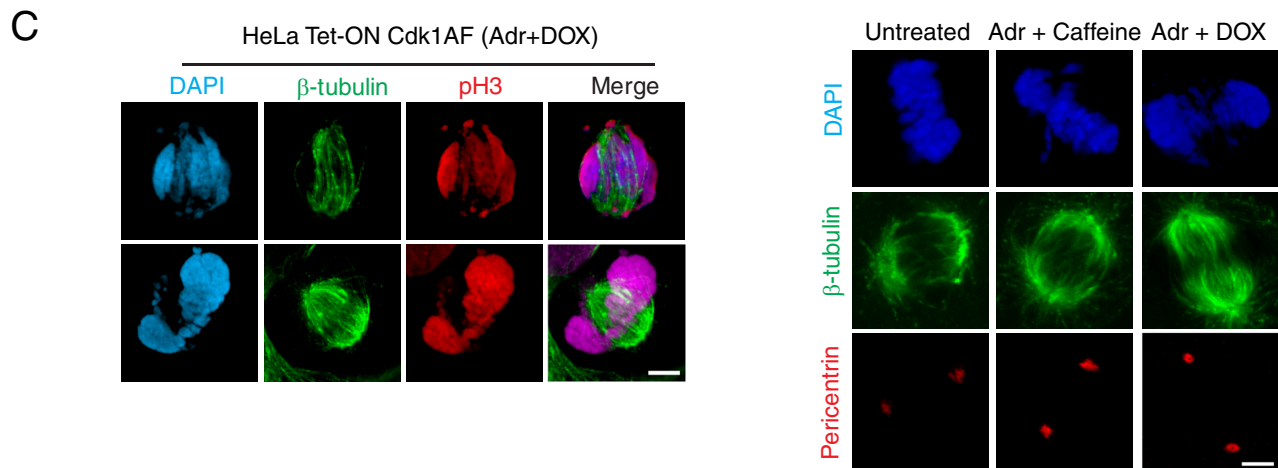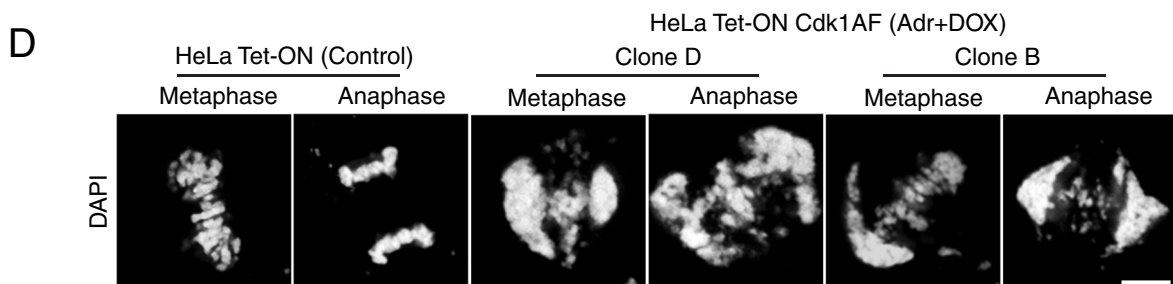

Supplementary Figure S3

A

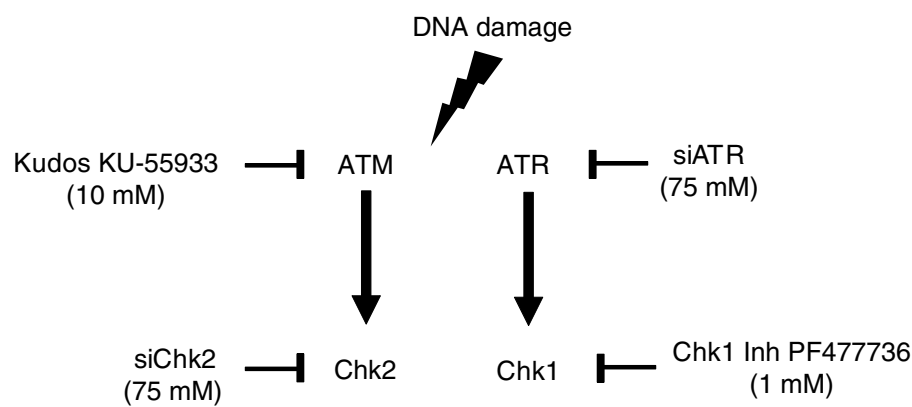

B

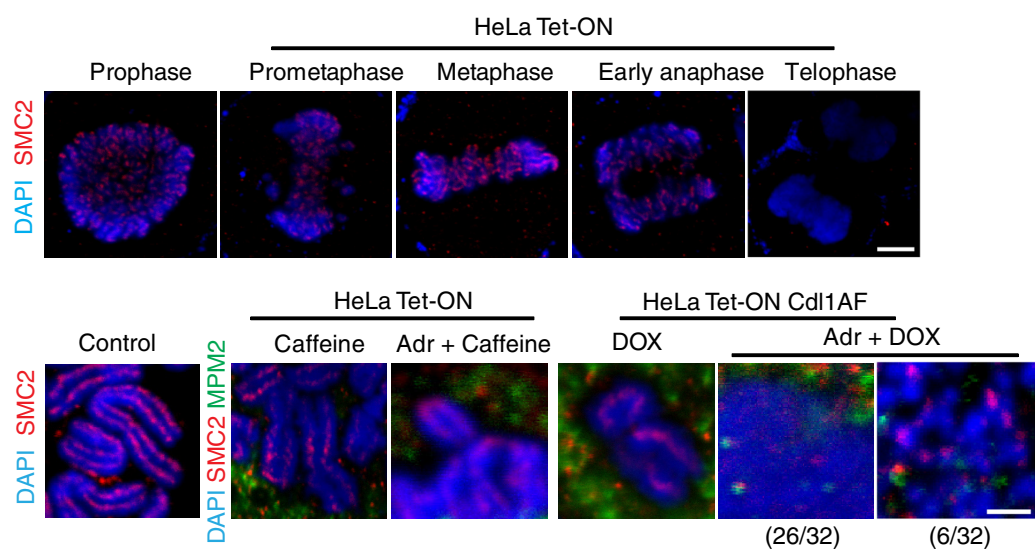

C

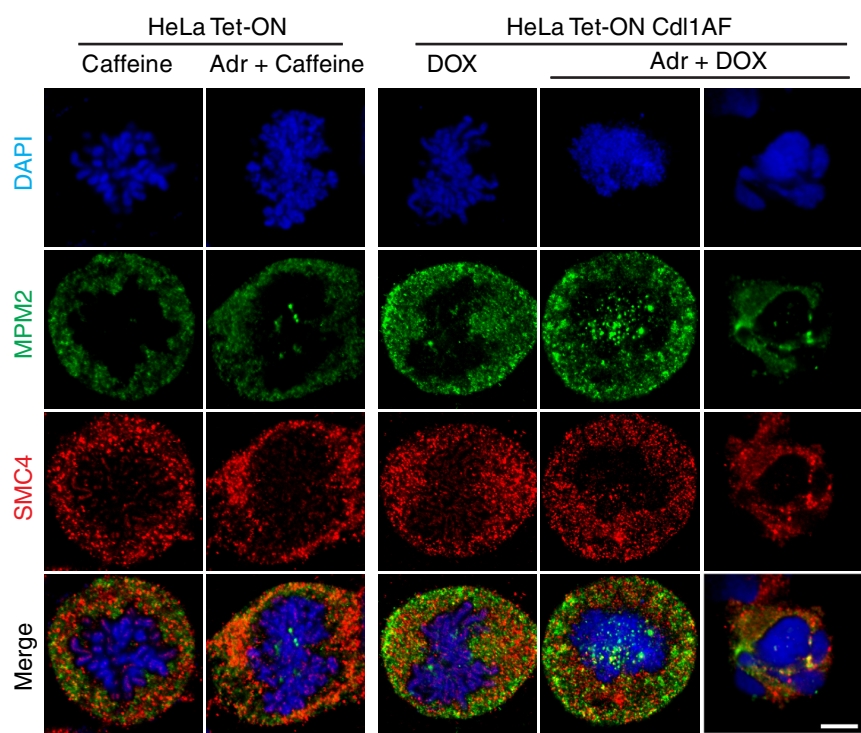

Supplementary Figure S4

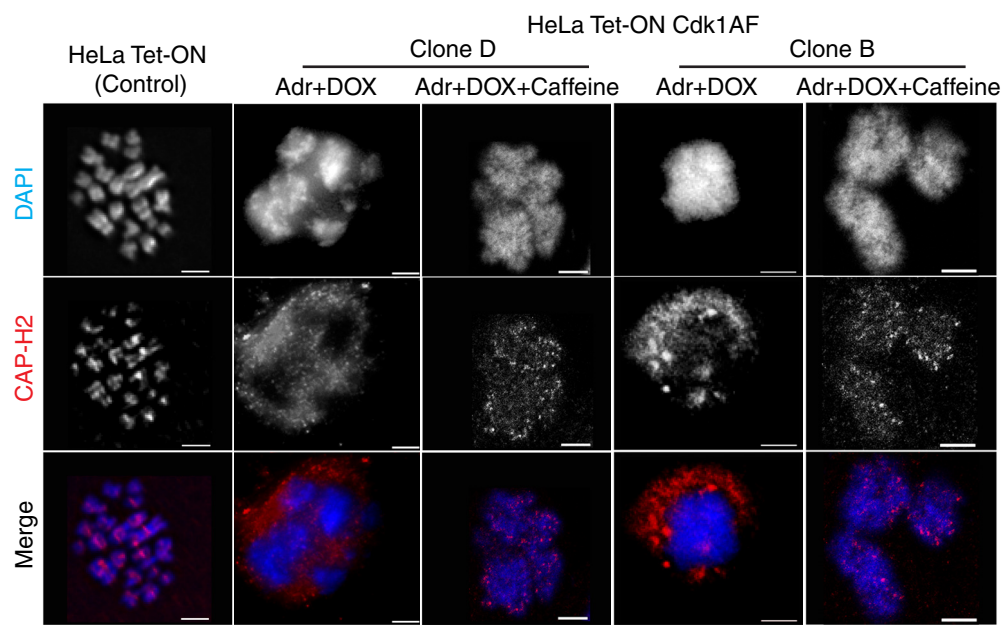

Supplementary Figure S5

| Antigen                       | Catalog number | Species | Usage and dilution |        |        |       | Source |                                                                                      |  |
|-------------------------------|----------------|---------|--------------------|--------|--------|-------|--------|--------------------------------------------------------------------------------------|--|
|                               |                |         | Usage and dilution | IF     | WB     | IP    | FACS   |                                                                                      |  |
| ACA (anti-crest antWBody)     |                | Human   | IF                 | 1:1000 |        |       |        | Kindly donated by Dr. Brian Gabrieli, University of Queensland Diamantina Institute. |  |
| ATR (N-19)                    | sc-1887        | Goat    | WB                 |        | 1:200  |       |        | Santa Cruz Biotechnology                                                             |  |
| b-actin                       | ab3280-500     | Mouse   | WB                 |        | 1:800  |       |        | Abcam                                                                                |  |
| b-tubulin                     | T 0198         | Mouse   | IF                 | 1:1000 |        |       |        | Sigma-Aldrich                                                                        |  |
| b-tubulin                     | RB-9249-P      | Rabbit  | IF                 | 1:500  |        |       |        | NeoMarkers                                                                           |  |
| BubR1 [8G1]                   | ab4637         | Mouse   | IF                 | 1:500  |        |       |        | Abcam                                                                                |  |
| CAP-D2                        | sc-101012      | Mouse   | IF/WB              | 1:500  | 1:500  |       |        | Santa Cruz Biotechnology                                                             |  |
| CAP-D3                        | SC-101016      | Mouse   | WB                 |        | 1:500  |       |        | Santa Cruz Biotechnology                                                             |  |
| CAP-G                         | sc-101014      | Mouse   | IF/WB              | 1:500  | 1:500  |       |        | Santa Cruz Biotechnology                                                             |  |
| CAP-G2                        | HPA 026631     | Rabbit  | IF/IP              | 1:500  |        | 1:10  |        | Sigma-Aldrich                                                                        |  |
| CAP-G2                        |                | Rabbit  | WB                 |        | 1:500  |       |        | Kindly donated by Dr Keiji Kimura, University of Tsukuba                             |  |
| CAP-H                         | HPA002647      | Rabbit  | WB                 |        | 1:500  |       |        | Sigma-Aldrich                                                                        |  |
| CAP-H2                        |                | Rabbit  | WB                 |        | 1:500  |       |        | Kindly donated by Dr J.M Peters, The Research Institute of Molecular Pathology (IMP) |  |
| Cdk1/Cdc2 p34                 | 610037         | Mouse   | WB/IP              |        | 1:500  | 1:100 |        | Becton Dickinson                                                                     |  |
| Chk1 (G-4)                    | sc-8408        | Mouse   | WB                 |        | 1:500  |       |        | Santa Cruz Biotechnology                                                             |  |
| Chk2 (A-11)                   | sc-17747       | Mouse   | WB                 |        | 1:500  |       |        | Santa Cruz Biotechnology                                                             |  |
| Cyclin B1 (H-433)             | sc-752         | Rabbit  | IF/WB              | 1:500  | 1:500  |       |        | Santa Cruz Biotechnology                                                             |  |
| Flag M2                       | F 3165         | Mouse   | WB/IP              |        | 1:500  | 1:50  |        | Sigma-Aldrich                                                                        |  |
| GFP                           | ab13970        | Chicken | IF/WB              | 1:500  | 1:500  |       |        | Abcam                                                                                |  |
| Giantin (N-18)                | sc-46993       | Goat    | IF                 | 1:500  |        |       |        | Santa Cruz Biotechnology                                                             |  |
| Histone H3                    | ab1791         | Rabbit  | WB                 |        | 1:1000 |       |        | Abcam                                                                                |  |
| Lamin A/C                     | 2032           | Rabbit  | IF                 | 1:500  |        |       |        | Cell Signaling Technology                                                            |  |
| MPM2                          | 05-368         | Mouse   | IF/FACS            | 1:1000 |        |       | 1:200  | Upstate Biotechnology                                                                |  |
| ORC2 (3G6)                    | sc-32734       | Rat     | WB                 |        | 1:500  |       |        | Santa Cruz Biotechnology                                                             |  |
| p53                           | sc-126 (DO-1)  | Mouse   | WB                 |        | 1:500  |       |        | Santa Cruz Biotechnology                                                             |  |
| Pericentrin                   | ab28144        | Mouse   | IF                 | 1:500  |        |       |        | Abcam                                                                                |  |
| Phospho - Chk1 (Ser 345)      | 2341           | Rabbit  | WB                 |        | 1:500  |       |        | Cell Signaling Technology                                                            |  |
| Phospho-Chk1 (S317)           | IHC-00068      | Rabbit  | WB                 |        | 1:500  |       |        | Bethyl Laboratories                                                                  |  |
| Phospho-Chk1 (Ser317)         | 2344           | Rabbit  | WB                 |        | 1:500  |       |        | Cell Signaling Technology                                                            |  |
| Phospho-Chk2 (Thr68)          | 2661           | Rabbit  | WB                 |        | 1:500  |       |        | Cell Signaling Technology                                                            |  |
| Phospho-histone H2AX (ser139) | 2577S          | Rabbit  | IF/WB              | 1:500  | 1:500  |       |        | Cell Signaling Technology                                                            |  |
| Phospho-Histone H3 (Ser10)    | sc-8656        | Rabbit  | IF/WB              | 1:500  | 1:500  |       |        | Santa Cruz Biotechnology                                                             |  |
| Phospho-Histone H3 (Ser10)    | 9701           | Rabbit  | IF/WB              | 1:1000 | 1:500  |       |        | Cell Signaling Technology                                                            |  |
| Phospho-p53 (Ser15)           | 9284           | Rabbit  | WB                 |        | 1:500  |       |        | Cell Signaling Technology                                                            |  |
| Phospho-Serine/Threonine      | PP2551         | Rabbit  | IP                 |        |        | 1:10  |        | ECM Biosciences                                                                      |  |
| Phospho-Tyrosine              | PP2221         | Rabbit  | IP                 |        |        | 1:10  |        | ECM Biosciences                                                                      |  |
| PLK1 (polo-like kinase 1)     | ab17057        | Mouse   | IF                 | 1:500  |        |       |        | Abcam                                                                                |  |
| Rad51(H-92)                   | sc-8349        | Rabbit  | IF                 | 1:500  |        |       |        | Santa Cruz Biotechnology                                                             |  |
| Securin                       | ab3305         | Mouse   | IF                 | 1:500  |        |       |        | Abcam                                                                                |  |
| Shugoshin (Sgo1)              | H00151648-M01  | Mouse   | IF                 | 1:500  |        |       |        | Abnova                                                                               |  |
| SMC2                          | A300-058A      | Rabbit  | IF/WB/IP           | 1:500  | 1:1000 | 1:50  |        | Bethyl Laboratories                                                                  |  |
| SMC2                          | AM05324PU-N    | Mouse   | WB                 |        | 1:1000 |       |        | Acris                                                                                |  |
| SMC4                          | A300-064A      | Rabbit  | IF                 | 1:500  |        |       |        | Bethyl Laboratories                                                                  |  |

## **Supplementary Figure Legends**

### **Figure S1. Comparable cell cycle progression profiles of HeLa Tet-ON and HeLa Tet-ON Cdk1AF cells.**

A HeLa Tet-ON, HeLa Tet-ON Cdk1AF clone B and clone D cells were synchronised by a combined serum starvation and thymidine protocol (Materials and Methods), then washed and released into medium with doxycycline (DOX, 1 µg/ml) or without DOX as described in Fig. 1B. Cells at 0, 4, 8, 12 and 24h post-release were collected for FACS.

B Synchronised HeLa Tet-ON and HeLa Tet-ON Cdk1AF cells were released into medium with doxycycline (DOX, 1 µg/ml) or without DOX. Cells were collected at 24h post-release and stained with γH2AX (red, bottom panel) and DAPI (blue, top panel). Images taken using 10 x objective are shown in the left panel; images taken by 60 x objectives are shown in the middle panel. Representative images for interphase cells, metaphase and anaphase cells with <5 γH2AX foci and no γH2AX are shown. Scale bar represents 5 µm. Box plots for percentage of cells with <5 γH2AX foci are shown in the right panel. There is no significant difference (NS) between HeLa Tet-ON (-DOX) and HeLa Tet-ON Cdk1AF (-DOX); between HeLa Tet-ON (-DOX) and HeLa Tet-ON Cdk1AF (+DOX).

C Cells were treated as described in Fig. S1B, cells were collected and stained Rad51 (red, bottom panel) and DAPI (blue, top panel). Representative images for HeLa Tet-ON (-DOX) and HeLa Tet-ON Cdk1AF (-DOX) are shown.

### **Figure S2. Sustained pH3 staining on decondensed chromosomes in DNA-damaged Cdk1AF cells.**

A HeLa Tet-ON, HeLa Tet-ON Cdk1AF clone B and clone D cells were synchronised and released as described in Fig. S1A. Asynchronous (cyc) cells, and cells at 0, 4, 8, 12 and 24h post-release were collected for MPM2-FACS analysis. Scatter plots corresponding to

different time points are displayed in the left panel. Histogram shows percentage of MPM2 positive cells in different time points in the right panel.

B Representative immunofluorescence micrographs indicating mitotic hallmarks exhibited by HeLa Tet-ON Cdk1AF cells with DNA damage (synchronised and treated as described in Fig. 1B) are shown with DAPI-stained DNA, cyclin B (red, row 1), securin (red, row 2), shugoshin (red, row 3) and Plk1 (red, row 4). White arrows indicate prematurely decondensed chromosomes in metaphase, white arrowheads indicate chromosomes trapped in the cleavage furrow in late anaphase and telophase, and yellow arrows indicate fragmented chromatin in metaphase.

C Synchronised HeLa Tet-ON Cdk1AF cells were treated as described in Fig. 1B. Cells were collected and stained with anti-pH3 (red),  $\beta$ -tubulin antibodies (green) with DNA counterstained with DAPI (left hand side). Cells co-stained with anti-  $\beta$ -tubulin (green) and anti- pericentrin (red) antibodies to visualise centrosomal foci are shown (right).

D Synchronised HeLa Tet-ON, HeLa Tet-ON Cdk1AF clone B and clone D cells were treated as described in Fig. 1B. Cells were collected for DAPI staining. Representative images for abnormal metaphase and anaphase in HeLa Tet-ON Cdk1AF clone B and clone D cells are shown, with HeLa Tet-ON as controls. Scale bar represents 5  $\mu$ m.

#### **Figure S3. Loss of axial condensin localisation in damaged U2OS Cdk1AF cells.**

A Schematic diagram for siRNA and inhibitors used in Fig. 2D.

B Top panel shows immunofluorescence staining of SMC2 (red) during different phases of mitosis in cells with no drug treatment. Metaphase spread (bottom right) of damaged cells treated with caffeine (Adr+Caffeine) show axial localisation of SMC2 within each chromatid of the chromosomes. In damaged Cdk1AF cells (Adr+DOX), SMC2 is displaced from the chromatins or associates only loosely on fragmented chromosomes.

Chromosomes are stained with anti- SMC2 (red) and anti-MPM2 (green) and counterstained with DAPI. Normal mitotic cells with no drug treatment were used as control (bottom left). Scale bar represents 5  $\mu$ m.

C Synchronised HeLa Tet-ON and HeLa Tet-ON Cdk1AF cells were treated as described in Fig. 1B, trapped with nocodazole, harvested, hypotonically-swollen, fixed and stained for SMC4 (red) and MPM2 (green), with chromosomes counterstained with DAPI. Representative images are shown. Scale bar represents 5  $\mu$ m.

**Figure S4. Caffeine treatment restores condensins localisation in mitotic chromosomes.**

Synchronised HeLa Tet-ON, HeLa Tet-ON Cdk1AF clone B and clone D cells were treated as described in Fig. 1B. HeLa Tet-ON Cdk1AF clone B and clone D cells were collected at T=16 and stained for CAP-H2 (red) and DAPI (blue), with HeLa Tet-ON untreated cells as a control. Representative images are shown. Scale bar represents 5 $\mu$ m.

**Figure S5. List of primary antibodies used in this study**
